# Supplementary material
Source: Elsevier journal article supplement (https://www.sciencedirect.com/science/article/pii/S021391112100042X)
Supplement: mmc1 [file S021391112100042X:mmc1.doc]

Para los autores:

En la bibliografía, citar correctamente ref. 10

**Nota de campo**

**La toma de decisiones en salud comunitaria a través del mapeo de activos en salud**

Narcís Pou-Martía, Sílvia Oliveras-Casadellàb, Pau Batlle-Amatb, Xavier del Acebo Peñab, Maria Estrada-Oconb y Dolors Juvinyà-Canala,*

a*Cátedra de Promoción de la Salud, Universidad de Girona, Girona, España*

b*Organisme de Salut Pública de la Diputació de Girona (Dipsalut), Girona, España*

*Autora para correspondencia.

*Correo electrónico:* [dolors.juvinya@udg.edu](mailto:dolors.juvinya@udg.edu) (D. Juvinyà-Canal).

Twitter: @dolorsjuvinya

## RESUMEN

Se presenta la experiencia de redefinición de la metodología de mapeo de activos en salud, que tuvo como objetivo hacer posible el análisis según desigualdades de salud, así como su utilización como herramienta en procesos participativos de toma de decisiones en el ámbito de la Administración local. Para ello se diseñó un procedimiento replicable y apto para todas las edades y todos los colectivos. A su vez, se estableció una extensa clasificación de los activos no solo en el plano geográfico, sino también según el perfil de la persona y las características de los activos. El volcado de los datos en un sistema de información geográfica y la gran cantidad de activos recogidos permitieron ampliar la interpretación habitual de los datos obtenidos y presentar la información de forma dinámica.

## *Palabras clave:*

Activos para la salud

Promoción de la salud

Salud comunitaria

Salutogénesis

Desarrollo comunitario basado en activos

**Community health decision-making through the assets mapping**

## ABSTRACT

This is a report about the experience on redefining the health asset mapping methodology. The aim of this experience consisted of making an analysis on health inequalities, as well as of using it as a tool in decision making participative processes in the local administration area. Thus, a replicable procedure for all ages and groups was designed. Besides this, assets have been widely classified, in accordance with the territorial distribution, people’s profiles and asset features. Both the upload of data to a geographical information system and the large amount of data gathered allowed us to enlarge the common interpretation of data and present the information in a dynamic way.

## *Key words:*

Health assets

Health promotion

Community health

Salutogenesis

Assets-based community development model

## Introducción

La técnica del mapeo de activos, utilizada para la detección de todos aquellos factores que favorecen o protegen la salud de las personas o de una comunidad, resulta especialmente adecuada para trabajar la perspectiva salutogénica en un diagnóstico de salud comunitaria1. Destaca sin duda por tratarse de una metodología plástica, comprensible y adaptable a todos los entornos y colectivos2, de gran valor para el empoderamiento de las personas y de las comunidades, motivo por el cual no ha parado de ganar adeptos desde que en 2007 Morgan y Ziglio3 revisaron, desde la perspectiva de salud positiva, el concepto de activos comunitarios que Kretsmann et al.4 habían acuñado en 1993.

La definición de activo en salud más extendida y aceptada es también la que propusieron Morgan y Ziglio3: «cualquier factor (o recurso) que mejora la capacidad de las personas, grupos o comunidades, poblaciones, sistemas sociales o instituciones para mantener y conservar la salud y el bienestar, así como para ayudar a reducir las desigualdades en salud»3.

En la revisión sistemática sobre activos en salud realizada por Van Bortel et al.5 se observa la gran variedad de colectivos específicos que han sido el foco de los ensayos, y que la implicación de la población en procesos de salud comunitaria pasa por la metodología de mapeo de activos en salud.

El objetivo de nuestro ensayo fue adaptar metodológicamente y conceptualmente la dinámica de mapeo de activos en salud para hacer posible la explotación de datos del conjunto de la población según desigualdades en salud y la utilización de los resultados en la toma de decisiones municipal.

## Desarrollo de la experiencia

*El punto de partida*

Dipsalut, organismo autónomo de la Diputación de Girona encargado de dar cobertura a los 221 ayuntamientos de la demarcación de Girona en el cumplimiento de las obligaciones municipales en salud pública, inició en 2017 un programa piloto para elaborar planes municipales en colaboración con la Cátedra de Promoción de la Salud de la Universidad de Girona, incorporando la perspectiva de determinantes de la salud6, la visión salutogénica, la participación comunitaria y los ejes de desigualdad social (edad, sexo, territorio, clase y etnia)7.

*Los retos*

El propósito de analizar según ejes de desigualdad y ámbitos de análisis, y de triangular las diferentes partes de la diagnosis, obligaba a adaptar la dinámica de mapeo de activos.

La adaptación se centró en las fases de recogida de información e identificación de activos, y de análisis, interpretación y presentación de la información1, y concretamente en tres grandes aspectos, todos ellos orientados a la necesidad de sumar los resultados de las diferentes sesiones y garantizar una correcta interpretación y presentación, de gran ayuda para la fase de toma de decisiones.

1) Dinámica replicable y comprensible

El concepto «activo en salud» es desconocido por las personas ajenas al campo de la promoción de la salud, de manera que preguntar por los activos en salud requiere una serie de aclaraciones que invalidan la pregunta. Para resolverlo adaptamos las preguntas de Foot y Hopkins8, siendo de gran ayuda para facilitar a las personas participantes la identificación de lo que era para ellas un activo en salud:

- En [municipio], ¿qué/quién te hace sentir bien?
- En [municipio], ¿qué/quién te hace saludable?
- En [municipio], ¿qué/quién te ayuda a hacer frente a las dificultades?
- ¿Qué/quién hace que [municipio] sea un buen lugar para vivir?
- ¿Qué hace la comunidad para mejorar la salud y el bienestar?

Si bien en la convocatoria se utiliza el concepto «activos en salud», en la presentación de la sesión se añade también la explicación de estas preguntas (que llamamos «inspiradoras») y se acompañan de información sobre los posibles tipos de los activos en salud4-9: recursos humanos (personas), grupos e instituciones, actividades, espacios e intangibles.

Preguntas y tipos se presentan y repiten de forma oral durante la sesión. Se utilizan un mapa del casco urbano y un mapa del municipio, con imagen aérea y en soporte de cartón pluma.

A su vez, para evitar que aquellas personas con más iniciativa puedan influir sobre el resto, se utiliza una adaptación de la técnica de mapa mudo1. Se deja un tiempo previo de 10 minutos, durante los cuales las personas participantes piensan y preparan las notas adhesivas. Pasado este tiempo, se levantan y pegan sus propuestas en el mapa.

2) Los ejes de desigualdad

Para hacer posible el análisis de los resultados según las desigualdades7 se pide a las personas participantes que en cada una de las notas adhesivas en las que apuntan sus activos en salud indiquen, en un extremo, la edad y el sexo.

La sesión de trabajo en la que se recogen los activos (en los casos en que se celebran por colectivos) permite en ocasiones atribuir una determinada etnia y la clase social.

3) Clasificación, interpretación y presentación de los resultados

Cada uno de los activos recogidos se vacía en una hoja de cálculo y se clasifica según código de identificación, coordenadas GPS, edad, sexo, sesión de trabajo o colectivo, descripción del activo, categoría (24 categorías preestablecidas)10, subcategoría (según similitud entre activos), tipo de activo y ámbito de análisis con el que se identifica. Esta clasificación, y el correspondiente vaciado de los datos en un sistema de información geográfica, permite diversas formas de presentación y análisis. Los datos están disponibles en el Apéndice *on-line*.

Un ejemplo de la plasticidad son las presentaciones según la distribución geográfica, que se muestra en la figura 1, o según subcategorías, edad y sexo, que puede verse en la figura 2.

*El resultado*

De la explotación de 2230 activos en salud recogidos en el proceso celebrado en el primer municipio en que se desarrolló la experiencia (Torroella de Montgrí – Estartit), se han derivado evidencias destacables, como el vínculo ineludible entre actividad (sociocultural, deportiva, etc.) y activo en salud, el elevado valor del entorno natural y el vínculo de este con la actividad física, las características de los espacios o recursos que aportan salud o bienestar, la evolución del tipo de activos según la edad de las personas, las diferencias según la condición socioeconómica, o la importancia de aspectos esenciales como la familia, la amistad y las relaciones personales en el bienestar de las personas.

El método de recogida ha permitido un análisis y una amplia exposición de datos: geográfico, porcentual o cuantitativo, según categorías o subcategorías, y siempre con la posibilidad de analizar según ejes de desigualdad, especialmente sexo, edad y, en menor medida, clase social o etnia.

Los/las técnicos/as que realizaron la clasificación de los activos manifestaron la alta dedicación que supone su clasificación, así como la ampliación de las posibilidades de interpretación y presentación.

La incorporación de criterios de captación de participantes permitiría reforzar la mirada de desigualdades en salud.

## Conclusiones

La adaptación metodológica de las fases de recogida de información e identificación de activos, y de análisis, interpretación y presentación de la información, sumada a la incorporación de los ejes de desigualdad, al trabajo con sistemas de información geográfica y al elevado número de activos recogido, ha aportado información de gran valor para la fase de toma de decisiones y amplía el conocimiento sobre la construcción de la salud de las personas del municipio.

Se considera una buena herramienta para incorporar la visión de la ciudadanía, ya que permite identificar lo que la población considera como beneficioso para su bienestar, facilitando el diseño posterior de políticas. A la vez, hace posible el análisis con más profundidad de la relación entre percepción de la salud y espacio urbano.

**Apéndice. Material suplementario**

Puede consultarse material adicional a este artículo en su versión electrónica disponible en doi:10.1016….

**Editora responsable del artículo**

Clara Bermúdez-Tamayo.

**Contribuciones de autoría**

N. Pou-Martí, P. Batlle-Amat y X. del Acebo Peña diseñaron la adaptación metodológica. N. Pou-Martí coordinó el proceso participativo y redactó la versión inicial del manuscrito. Todas las personas firmantes analizaron los resultados, revisaron y aportaron elementos para su mejora, y aprobaron la versión final del manuscrito.

**Agradecimientos**

A todas las personas que han participado en el proceso, especialmente al personal técnico de los ayuntamientos de los municipios de Torroella de Montgrí – L’Estartit, Arbúcies y Sant Feliu de Guíxols, por su dedicación, y a Cristina Esparraguera por la información aportada a través de su trabajo de final de máster.

**Financiación**

Ninguna.

**Conflicto de intereses**

Ninguno.

## Bibliografía

1. Cofiño R, Aviñó D, Benedé CB, et al. Promoción de la salud basada en activos: ¿cómo trabajar con esta perspectiva en intervenciones locales? Gac Sanit. 2016;30(Supl 1):93-8.

2. Botello B, Palacio S, García M, et al. Metodología para el mapeo de activos de salud en una comunidad. Gac Sanit. 2013;27:180-3.

3. Morgan A, Ziglio E. Revitalising the evidence base for public health: an assets model. Promot Educ. 2007;14(2 Suppl):17-22.

4. Kretzmann JP, McKnight JL, Dobrowolski S, et al. Discovering community power: a guide to mobilizing local assets and your organitzation’s capacity. Evanston, IL; 2005.

5. Bortel T Van, Wickramasinghe ND, Morgan A, et al. Health assets in a global context: a systematic review of the literature. BMJ Open. 2019;9:e023810.

6. Dalhlgren G, Whitehead M. Policies and strategies to promote social equity in health. Background document to WHO – Strategy paper for Europe. Institute for Futures Studies; 1991.

7. Comisión para Reducir las Desigualdades Sociales en Salud en España. Avanzando hacia la equidad. Propuesta de políticas e intervenciones para reducir las desigualdades sociales en salud en España. Madrid; 2010.

8. Foot J, Hopkins T. A glass half-full: how an asset approach can improve community health and well-being. 2010. Disponible en: http://www.assetbasedconsulting.net/uploads/publications/A%20glass%20half%20full.pdf

9. Vera-Remartínez EJ, Paredes-Carbonell JJ, Aviñó Juan-Ulpiano D, et al. Sentido de coherencia y mapa de activos para la salud en jóvenes presos de la Comunidad Valenciana en España. Glob Health Promot. 2017;24:112-21.

10. Esparraguera Cla C. Els actius per a la salut a Torroella de Montgrí. 2018.


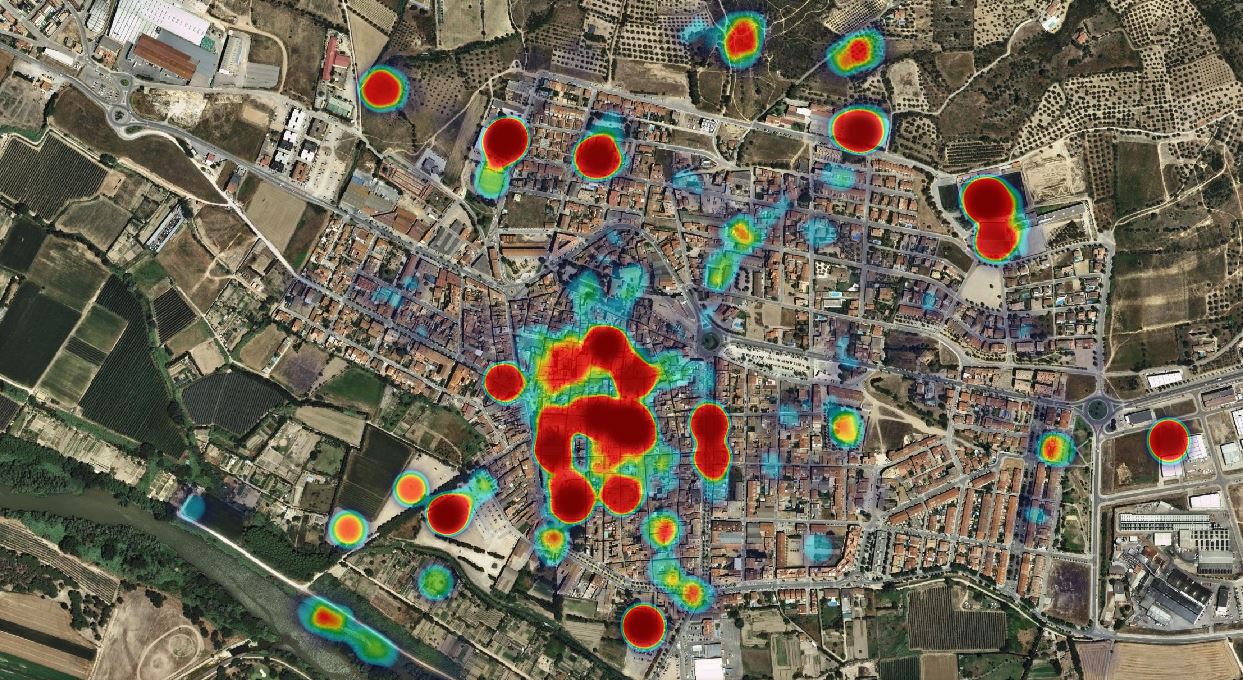


**Figura 1.** Distribución de activos en salud según el mapa de calor en el núcleo urbano de Torroella de Montgrí (2018).


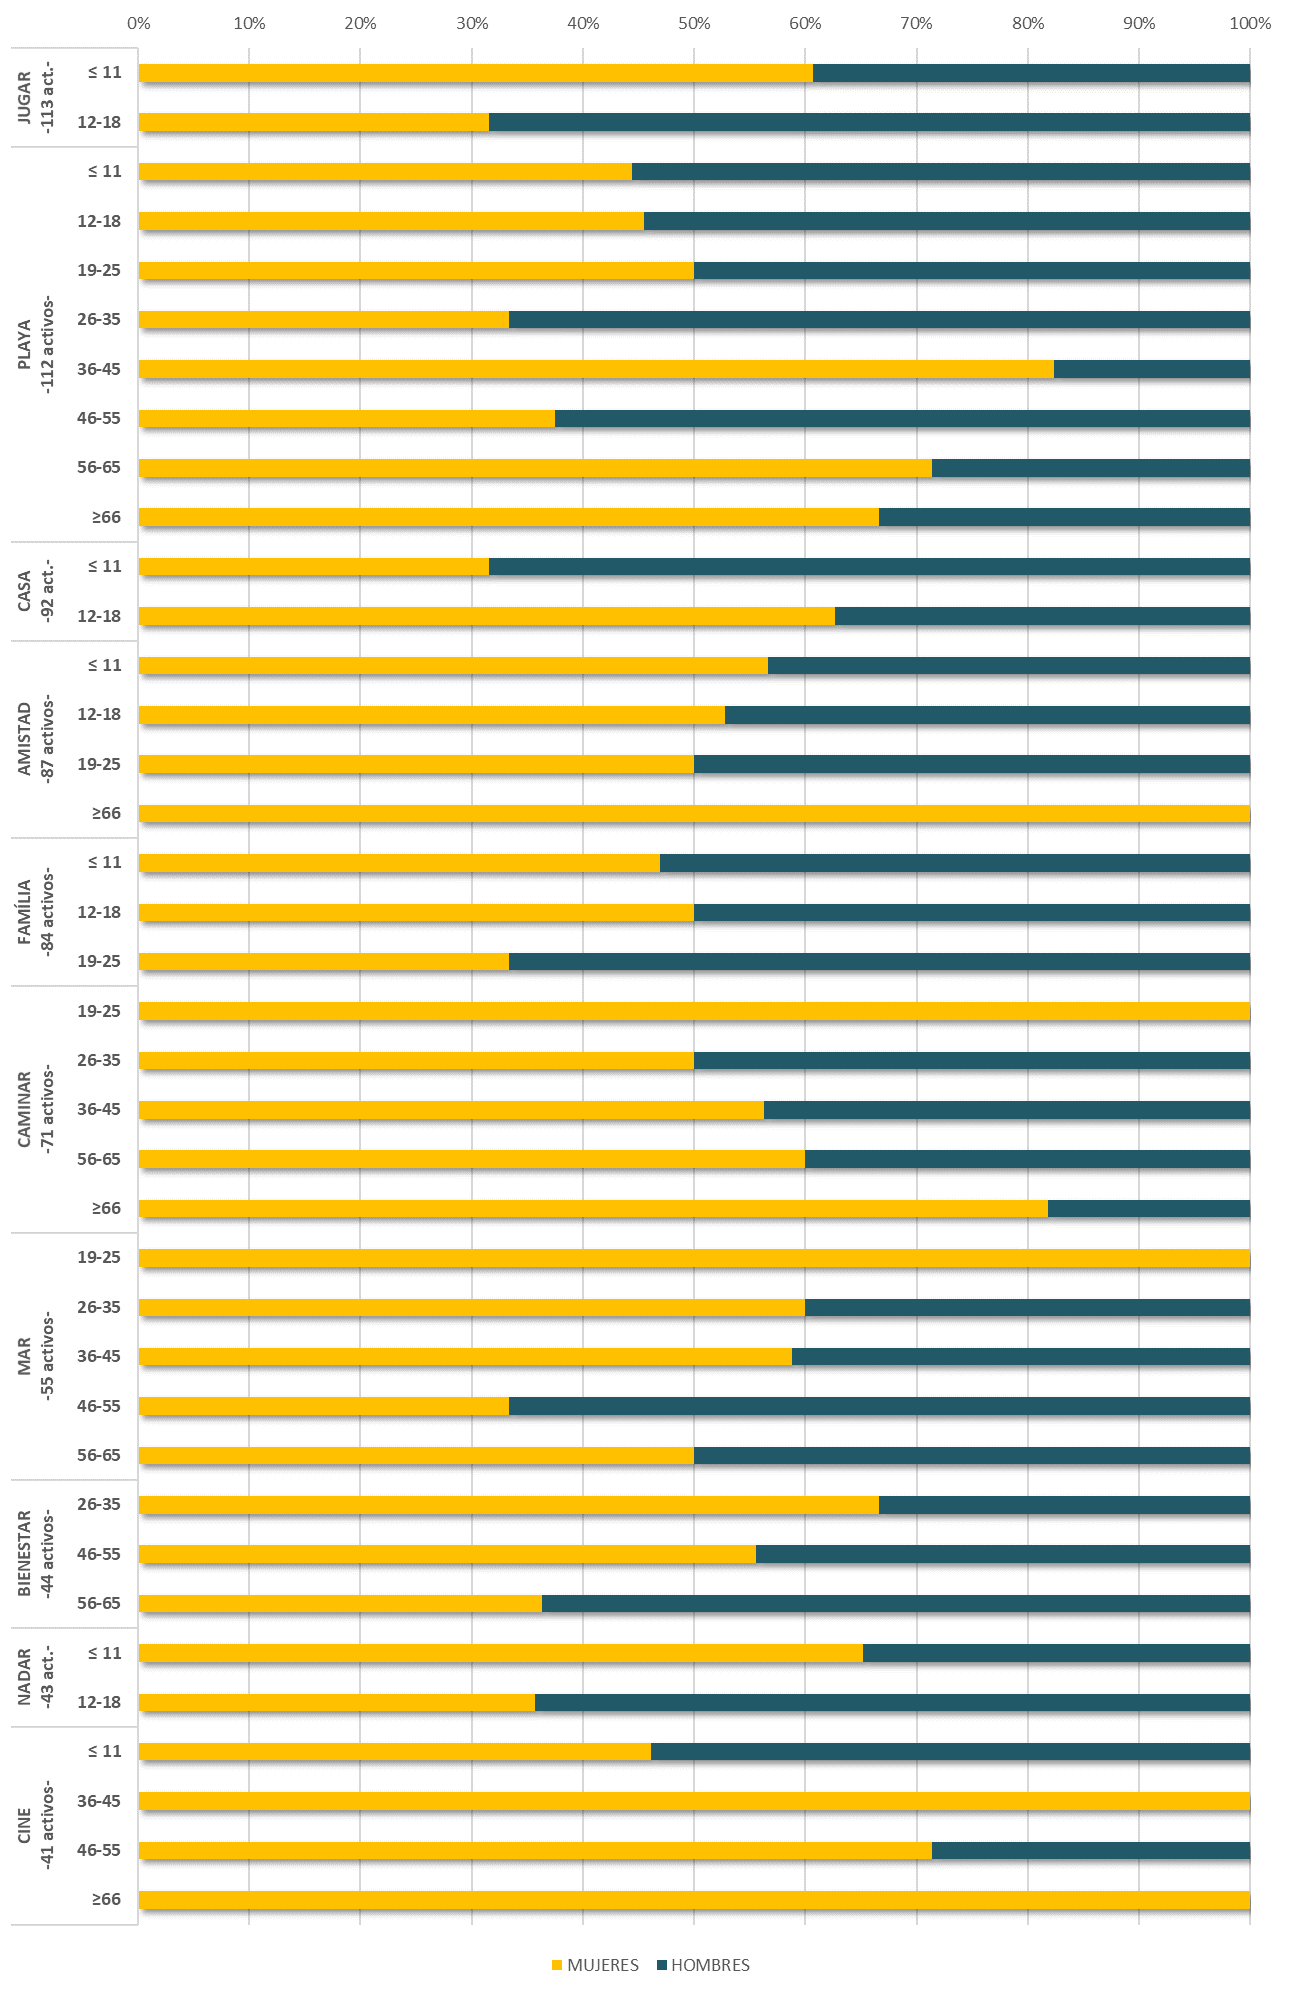


**Figura 2.** Distribución de las 10 primeras subcategorías por número de activos según sexo y grupos de edad en el municipio de Torroella de Montgrí – l’Estartit (2018).
